# Supplementary material
Source: PubMed Central journal article supplement (PMC10569748)

## SUPPORTING INFORMATION

### **Catalytic Mechanism of Cruzain from *Trypanosoma cruzi* as Determined from Solvent Kinetic Isotope Effects of Steady-State and Pre-Steady-State Kinetics<sup>‡</sup>**

Xiang Zhai<sup>§</sup> and Thomas D. Meek\*

Department of Biochemistry and Biophysics, Texas A&M University, College Station, TX  
77843, USA

<sup>‡</sup>This work was supported by Texas A&M AgriLife Research and National Institutes of Health Grant R21AI127634.

<sup>§</sup>Current address: Discovery Sciences, AstraZeneca R&D Boston, 35 Gatehouse Drive, Waltham, MA 02451

\*Author to whom correspondence should be addressed

*Phone:* (979) 458 9787

*Email:* tdmeek@tamu.edu

Running Title: Catalytic Mechanism of Cruzain

**Table S1-S3** Steady-state Kinetic Data for Wildtype Cruzain-catalyzed Reactions of Z-FR-AMC, Z-RR-AMC and Z-RA-AMC in H<sub>2</sub>O and D<sub>2</sub>O.

**Table S4-S6** Steady-state Kinetic Data for E208A Mutant Cruzain-catalyzed Reactions of Z-FR-AMC, Z-RR-AMC and Z-RA-AMC in H<sub>2</sub>O.

**Table S7** pK Values Determined from Fitting the pH-rate Profiles Data for E208A Mutant of Cruzain According to Eq. 5.

**Figure S1-S3** pH-rate Profiles for the E208A mutant of cruzain with Z-FR-AMC, Z-RR-AMC and Z-RA-AMC in H<sub>2</sub>O. The dashed line represents data fitted according to eq. 4. The solid line represents data fitted to eq. 5 as described in the text, with the results summarized in Tables S1.

**Figure S4-S5** Pre-steady-state Data and the Replots of Pre-steady-state Kinetic Constants for Cruzain-catalyzed Reactions of Z-RR-AMC in H<sub>2</sub>O and D<sub>2</sub>O.

Table S1. pH-rate Profile and Solvent Isotope Effects of Wildtype Cruzain with Z-FR-AMC.

| pH  | $k_{\text{cat}}$ ( $\text{s}^{-1}$ ) | $K_{\text{m}}$ ( $\mu\text{M}$ ) | $k_{\text{cat}}/K_{\text{m}}$ ( $\text{M}^{-1}\text{s}^{-1}$ ) |
|-----|--------------------------------------|----------------------------------|----------------------------------------------------------------|
| 3.5 | $13 \pm 1.6$                         | $5.2 \pm 0.3$                    | $(2.5 \pm 0.4) \times 10^6$                                    |
| 4.1 | $13 \pm 1.3$                         | $1.9 \pm 0.3$                    | $(6.8 \pm 0.8) \times 10^6$                                    |
| 4.4 | $14 \pm 1.4$                         | $2.5 \pm 0.2$                    | $(5.6 \pm 0.9) \times 10^6$                                    |
| 5.0 | $14.1 \pm 0.8$                       | $1.3 \pm 0.1$                    | $(1.1 \pm 0.2) \times 10^7$                                    |
| 5.6 | $13.6 \pm 0.7$                       | $0.87 \pm 0.1$                   | $(1.6 \pm 0.1) \times 10^7$                                    |
| 6.0 | $13.5 \pm 0.2$                       | $0.88 \pm 0.1$                   | $(1.5 \pm 0.1) \times 10^7$                                    |
| 6.5 | $13.5 \pm 0.8$                       | $0.70 \pm 0.04$                  | $(1.9 \pm 0.2) \times 10^7$                                    |
| 7.0 | $14 \pm 1.3$                         | $0.68 \pm 0.03$                  | $(2.1 \pm 0.3) \times 10^7$                                    |
| 7.5 | $17 \pm 1.7$                         | $0.62 \pm 0.02$                  | $(2.7 \pm 0.4) \times 10^7$                                    |
| 8.0 | $16 \pm 1.4$                         | $0.61 \pm 0.04$                  | $(2.6 \pm 0.4) \times 10^7$                                    |
| 8.5 | $15 \pm 0.9$                         | $0.56 \pm 0.06$                  | $(2.7 \pm 0.5) \times 10^7$                                    |

|     |              |                 |                             |
|-----|--------------|-----------------|-----------------------------|
| 9.0 | $14 \pm 1.7$ | $0.54 \pm 0.07$ | $(2.6 \pm 0.4) \times 10^7$ |
| 9.5 | $13 \pm 1.0$ | $0.77 \pm 0.09$ | $(1.5 \pm 0.2) \times 10^7$ |

---

---

| pD  | $k_{\text{cat}}$ ( $\text{s}^{-1}$ ) | $K_{\text{m}}$ ( $\mu\text{M}$ ) | $k_{\text{cat}}/K_{\text{m}}$ ( $\text{M}^{-1}\text{s}^{-1}$ ) |
|-----|--------------------------------------|----------------------------------|----------------------------------------------------------------|
| 3.5 | $5.5 \pm 0.3$                        | $4.0 \pm 0.5$                    | $(1.4 \pm 0.3) \times 10^6$                                    |
| 4.0 | $5.3 \pm 0.2$                        | $2.9 \pm 0.3$                    | $(1.8 \pm 0.3) \times 10^6$                                    |
| 4.5 | $7.6 \pm 0.1$                        | $2.2 \pm 0.1$                    | $(3.5 \pm 0.2) \times 10^6$                                    |
| 5.0 | $8.0 \pm 0.2$                        | $1.7 \pm 0.1$                    | $(4.7 \pm 0.4) \times 10^6$                                    |
| 5.5 | $8.4 \pm 0.2$                        | $1.3 \pm 0.1$                    | $(6.5 \pm 0.6) \times 10^6$                                    |
| 6.0 | $8.3 \pm 0.1$                        | $0.82 \pm 0.03$                  | $(1.0 \pm 0.1) \times 10^7$                                    |
| 6.5 | $8.0 \pm 0.1$                        | $0.54 \pm 0.06$                  | $(1.5 \pm 0.2) \times 10^7$                                    |
| 7.0 | $7.6 \pm 0.1$                        | $0.44 \pm 0.03$                  | $(1.7 \pm 0.1) \times 10^7$                                    |
| 7.5 | $7.5 \pm 0.1$                        | $0.45 \pm 0.01$                  | $(1.7 \pm 0.1) \times 10^7$                                    |
| 8.0 | $7.2 \pm 0.1$                        | $0.41 \pm 0.02$                  | $(1.8 \pm 0.1) \times 10^7$                                    |
| 8.5 | $5.8 \pm 0.1$                        | $0.32 \pm 0.02$                  | $(1.8 \pm 0.1) \times 10^7$                                    |
| 9.0 | $5.2 \pm 0.1$                        | $0.30 \pm 0.02$                  | $(1.7 \pm 0.2) \times 10^7$                                    |
| 9.5 | $4.7 \pm 0.1$                        | $0.29 \pm 0.03$                  | $(1.6 \pm 0.2) \times 10^7$                                    |

---

Table S2. pH-rate Profile and Solvent Isotope Effects Data of Wildtype Cruzain with Z-RR-AMC.

| pH  | $k_{\text{cat}}$ ( $\text{s}^{-1}$ ) | $K_{\text{m}}$ ( $\mu\text{M}$ ) | $k_{\text{cat}}/K_{\text{m}}$ ( $\text{M}^{-1}\text{s}^{-1}$ ) |
|-----|--------------------------------------|----------------------------------|----------------------------------------------------------------|
| 3.5 | $0.10 \pm 0.02$                      | $78 \pm 4$                       | $(2.2 \pm 0.1) \times 10^3$                                    |
| 4.1 | $0.40 \pm 0.03$                      | $68 \pm 4$                       | $(5.9 \pm 0.8) \times 10^3$                                    |
| 4.4 | $0.70 \pm 0.04$                      | $56 \pm 3$                       | $(1.3 \pm 0.2) \times 10^4$                                    |
| 5.0 | $1.9 \pm 0.2$                        | $28 \pm 3$                       | $(7.0 \pm 1) \times 10^4$                                      |
| 5.5 | $3.7 \pm 0.3$                        | $17 \pm 1$                       | $(2.2 \pm 0.1) \times 10^5$                                    |
| 6.0 | $5.9 \pm 0.5$                        | $11 \pm 1$                       | $(5.4 \pm 0.4) \times 10^5$                                    |
| 6.5 | $6.9 \pm 0.1$                        | $6.6 \pm 0.5$                    | $(1.0 \pm 0.1) \times 10^6$                                    |
| 7.0 | $7.4 \pm 0.1$                        | $4.6 \pm 0.4$                    | $(1.6 \pm 0.2) \times 10^6$                                    |
| 7.5 | $7.2 \pm 0.1$                        | $3.7 \pm 0.4$                    | $(1.9 \pm 0.2) \times 10^6$                                    |
| 8.0 | $8.0 \pm 0.2$                        | $4.3 \pm 0.3$                    | $(1.9 \pm 0.2) \times 10^6$                                    |
| 8.5 | $6.9 \pm 0.1$                        | $2.9 \pm 0.2$                    | $(2.4 \pm 0.2) \times 10^6$                                    |
| 9.0 | $7.1 \pm 0.2$                        | $3.6 \pm 0.3$                    | $(2.0 \pm 0.2) \times 10^6$                                    |
| 9.5 | $5.8 \pm 0.2$                        | $4.1 \pm 0.5$                    | $(1.5 \pm 0.2) \times 10^6$                                    |
| 9.9 | $5.8 \pm 0.2$                        | $12 \pm 1$                       | $(4.8 \pm 0.1) \times 10^5$                                    |

| pD  | $k_{\text{cat}}$ ( $\text{s}^{-1}$ ) | $K_{\text{m}}$ ( $\mu\text{M}$ ) | $k_{\text{cat}}/K_{\text{m}}$ ( $\text{M}^{-1}\text{s}^{-1}$ ) |
|-----|--------------------------------------|----------------------------------|----------------------------------------------------------------|
| 3.5 | n.d.                                 | n.d.                             | $(2.3 \pm 0.3) \times 10^2$                                    |
| 4.0 | n.d.                                 | n.d.                             | $(8.4 \pm 0.9) \times 10^2$                                    |
| 4.5 | n.d.                                 | n.d.                             | $(2.6 \pm 0.4) \times 10^3$                                    |
| 5.0 | $0.30 \pm 0.05$                      | $36 \pm 9$                       | $(8.3 \pm 0.6) \times 10^3$                                    |
| 5.5 | $1.1 \pm 0.1$                        | $22 \pm 1$                       | $(5.0 \pm 0.7) \times 10^4$                                    |
| 6.0 | $2.2 \pm 0.2$                        | $16 \pm 1$                       | $(1.4 \pm 0.2) \times 10^5$                                    |
| 6.5 | $3.5 \pm 0.2$                        | $13 \pm 3$                       | $(2.7 \pm 0.8) \times 10^5$                                    |
| 7.0 | $4.1 \pm 0.1$                        | $7.5 \pm 0.9$                    | $(5.5 \pm 0.8) \times 10^5$                                    |
| 7.5 | $4.1 \pm 0.3$                        | $6.3 \pm 0.9$                    | $(6.5 \pm 1.4) \times 10^5$                                    |
| 8.0 | $4.0 \pm 0.2$                        | $2.6 \pm 0.3$                    | $(1.5 \pm 0.3) \times 10^6$                                    |
| 8.5 | $3.9 \pm 0.1$                        | $2.2 \pm 0.2$                    | $(1.8 \pm 0.2) \times 10^6$                                    |
| 9.0 | $3.6 \pm 0.1$                        | $2.1 \pm 0.1$                    | $(1.7 \pm 0.2) \times 10^6$                                    |
| 9.5 | $3.5 \pm 0.1$                        | $2.0 \pm 0.2$                    | $(1.8 \pm 0.2) \times 10^6$                                    |
| 9.8 | $2.8 \pm 0.1$                        | $2.3 \pm 0.4$                    | $(1.2 \pm 0.3) \times 10^6$                                    |

Table S3. pH-rate Profile and Solvent Isotope Effects Data of Wildtype Cruzain with Z-RA-AMC.

| pH  | $k_{\text{cat}}$ ( $\text{s}^{-1}$ ) | $K_{\text{m}}$ ( $\mu\text{M}$ ) | $k_{\text{cat}}/K_{\text{m}}$ ( $\text{M}^{-1}\text{s}^{-1}$ ) |
|-----|--------------------------------------|----------------------------------|----------------------------------------------------------------|
| 3.5 | $0.0030 \pm 0.0002$                  | $50 \pm 9$                       | $(6.0 \pm 0.9) \times 10^1$                                    |
| 4.1 | $0.012 \pm 0.002$                    | $76 \pm 3$                       | $(1.6 \pm 0.3) \times 10^2$                                    |
| 4.5 | $0.023 \pm 0.001$                    | $37 \pm 6$                       | $(6.2 \pm 0.9) \times 10^2$                                    |
| 5.0 | $0.076 \pm 0.004$                    | $52 \pm 1$                       | $(1.5 \pm 0.4) \times 10^3$                                    |
| 5.6 | $0.21 \pm 0.04$                      | $56 \pm 2$                       | $(3.8 \pm 0.8) \times 10^3$                                    |
| 6.0 | $0.44 \pm 0.02$                      | $52 \pm 5$                       | $(8.2 \pm 0.8) \times 10^3$                                    |
| 6.5 | $0.58 \pm 0.01$                      | $35 \pm 1$                       | $(1.7 \pm 0.1) \times 10^4$                                    |
| 7.0 | $0.67 \pm 0.02$                      | $29 \pm 2$                       | $(2.3 \pm 0.2) \times 10^4$                                    |
| 7.5 | $0.89 \pm 0.06$                      | $38 \pm 2$                       | $(2.3 \pm 0.3) \times 10^4$                                    |
| 8.0 | $0.81 \pm 0.10$                      | $32 \pm 2$                       | $(2.5 \pm 0.2) \times 10^4$                                    |
| 8.5 | $0.83 \pm 0.13$                      | $32 \pm 1$                       | $(2.5 \pm 0.5) \times 10^4$                                    |
| 9.0 | $1.0 \pm 0.2$                        | $58 \pm 8$                       | $(1.7 \pm 0.1) \times 10^4$                                    |
| 9.5 | $0.86 \pm 0.17$                      | $36 \pm 1$                       | $(2.4 \pm 0.4) \times 10^4$                                    |
| 9.9 | $0.68 \pm 0.03$                      | $31 \pm 3$                       | $(2.2 \pm 0.4) \times 10^4$                                    |



| pD  | $k_{\text{cat}}$ ( $\text{s}^{-1}$ ) | $K_{\text{m}}$ ( $\mu\text{M}$ ) | $k_{\text{cat}}/K_{\text{m}}$ ( $\text{M}^{-1}\text{s}^{-1}$ ) |
|-----|--------------------------------------|----------------------------------|----------------------------------------------------------------|
| 3.5 | $(8.5 \pm 0.5) \times 10^{-4}$       | $16 \pm 5$                       | $5.3 \pm 1.0$                                                  |
| 4.0 | $(1.4 \pm 0.1) \times 10^{-3}$       | $38 \pm 9$                       | $(4.0 \pm 1.0) \times 10^1$                                    |
| 4.5 | $(2.0 \pm 0.9) \times 10^{-3}$       | $18 \pm 1$                       | $(1.1 \pm 0.6) \times 10^2$                                    |
| 5.0 | $(1.4 \pm 0.4) \times 10^{-2}$       | $23 \pm 2$                       | $(6.0 \pm 2.0) \times 10^2$                                    |
| 5.6 | $(4.3 \pm 0.5) \times 10^{-2}$       | $27 \pm 1$                       | $(1.6 \pm 0.2) \times 10^3$                                    |
| 6.0 | $(1.2 \pm 0.2) \times 10^{-1}$       | $42 \pm 4$                       | $(2.9 \pm 0.8) \times 10^3$                                    |
| 6.5 | $(3.0 \pm 0.1) \times 10^{-1}$       | $42 \pm 4$                       | $(7.1 \pm 0.9) \times 10^3$                                    |
| 7.0 | $(4.1 \pm 0.1) \times 10^{-1}$       | $29 \pm 1$                       | $(1.4 \pm 0.1) \times 10^4$                                    |
| 7.5 | $(4.7 \pm 0.1) \times 10^{-1}$       | $24 \pm 1$                       | $(2.0 \pm 0.1) \times 10^4$                                    |
| 7.9 | $(4.9 \pm 0.2) \times 10^{-1}$       | $20 \pm 1$                       | $(2.5 \pm 0.2) \times 10^4$                                    |
| 8.5 | $(4.9 \pm 0.7) \times 10^{-1}$       | $25 \pm 2$                       | $(2.0 \pm 0.4) \times 10^4$                                    |
| 9.0 | $(4.9 \pm 0.7) \times 10^{-1}$       | $28 \pm 8$                       | $(1.8 \pm 0.8) \times 10^4$                                    |
| 9.5 | $(4.7 \pm 0.5) \times 10^{-1}$       | $29 \pm 3$                       | $(1.6 \pm 0.3) \times 10^4$                                    |
| 9.9 | $(3.9 \pm 0.2) \times 10^{-1}$       | $22 \pm 3$                       | $(1.8 \pm 0.3) \times 10^4$                                    |

Table S4. pH-rate Profile Data of E208A Mutant Cruzain with Z-FR-AMC.

| pH   | $k_{\text{cat}}$ ( $\text{s}^{-1}$ ) | $K_{\text{m}}$ ( $\mu\text{M}$ ) | $k_{\text{cat}}/K_{\text{m}}$ ( $\text{M}^{-1}\text{s}^{-1}$ ) |
|------|--------------------------------------|----------------------------------|----------------------------------------------------------------|
| 3.6  | $18 \pm 1$                           | $6.1 \pm 0.1$                    | $(3.0 \pm 0.2) \times 10^6$                                    |
| 3.9  | $19 \pm 1$                           | $5.0 \pm 0.1$                    | $(3.8 \pm 0.2) \times 10^6$                                    |
| 4.3  | $22 \pm 1$                           | $5.0 \pm 0.2$                    | $(4.4 \pm 1.0) \times 10^6$                                    |
| 4.5  | $23 \pm 1$                           | $3.6 \pm 0.1$                    | $(6.4 \pm 0.3) \times 10^7$                                    |
| 4.8  | $23 \pm 1$                           | $2.8 \pm 0.1$                    | $(8.2 \pm 0.5) \times 10^7$                                    |
| 5.1  | $24 \pm 1$                           | $2.5 \pm 0.1$                    | $(9.6 \pm 0.6) \times 10^7$                                    |
| 5.4  | $23 \pm 1$                           | $2.0 \pm 0.1$                    | $(12 \pm 0.8) \times 10^7$                                     |
| 5.7  | $23 \pm 1$                           | $1.7 \pm 0.1$                    | $(14 \pm 1.0) \times 10^7$                                     |
| 6.0  | $23 \pm 1$                           | $1.6 \pm 0.1$                    | $(14 \pm 1.0) \times 10^7$                                     |
| 6.3  | $23 \pm 1$                           | $1.5 \pm 0.1$                    | $(15 \pm 1.2) \times 10^7$                                     |
| 6.6  | $22 \pm 1$                           | $1.6 \pm 0.1$                    | $(14 \pm 1.1) \times 10^7$                                     |
| 6.9  | $22 \pm 1$                           | $1.6 \pm 0.1$                    | $(14 \pm 1.1) \times 10^7$                                     |
| 7.2  | $23 \pm 1$                           | $1.9 \pm 0.1$                    | $(12 \pm 0.8) \times 10^7$                                     |
| 7.5  | $21 \pm 1$                           | $1.6 \pm 0.1$                    | $(13 \pm 1.0) \times 10^7$                                     |
| 8.0  | $21 \pm 1$                           | $1.3 \pm 0.1$                    | $(16 \pm 1.4) \times 10^7$                                     |
| 8.5  | $19 \pm 1$                           | $1.3 \pm 0.1$                    | $(15 \pm 1.4) \times 10^7$                                     |
| 9.0  | $20 \pm 1$                           | $1.5 \pm 0.1$                    | $(13 \pm 1.1) \times 10^7$                                     |
| 9.5  | $19 \pm 1$                           | $1.9 \pm 0.1$                    | $(10 \pm 0.7) \times 10^7$                                     |
| 10.0 | $21 \pm 1$                           | $3.6 \pm 0.3$                    | $(5.8 \pm 1.4) \times 10^7$                                    |

Table S5. pH-rate Profile Data of E208A Mutant Cruzain with Z-RR-AMC.

| pH   | $k_{\text{cat}}$ ( $\text{s}^{-1}$ ) | $K_{\text{m}}$ ( $\mu\text{M}$ ) | $k_{\text{cat}}/K_{\text{m}}$ ( $\text{M}^{-1}\text{s}^{-1}$ ) |
|------|--------------------------------------|----------------------------------|----------------------------------------------------------------|
| 4.2  | $0.085 \pm 0.002$                    | $105 \pm 7$                      | $(8.1 \pm 0.5) \times 10^2$                                    |
| 4.5  | $0.10 \pm 0.01$                      | $83 \pm 11$                      | $(1.2 \pm 0.1) \times 10^3$                                    |
| 4.8  | $0.12 \pm 0.01$                      | $67 \pm 7$                       | $(1.8 \pm 0.1) \times 10^3$                                    |
| 5.1  | $0.14 \pm 0.01$                      | $58 \pm 5$                       | $(2.4 \pm 0.1) \times 10^3$                                    |
| 5.4  | $0.15 \pm 0.01$                      | $47 \pm 3$                       | $(3.2 \pm 0.1) \times 10^3$                                    |
| 5.7  | $0.18 \pm 0.01$                      | $47 \pm 3$                       | $(3.8 \pm 0.1) \times 10^3$                                    |
| 6.0  | $0.22 \pm 0.01$                      | $48 \pm 2$                       | $(4.6 \pm 0.1) \times 10^3$                                    |
| 6.3  | $0.26 \pm 0.02$                      | $52 \pm 5$                       | $(5.0 \pm 0.2) \times 10^3$                                    |
| 6.6  | $0.27 \pm 0.01$                      | $49 \pm 4$                       | $(5.5 \pm 0.4) \times 10^3$                                    |
| 6.9  | $0.27 \pm 0.01$                      | $47 \pm 5$                       | $(5.8 \pm 0.6) \times 10^3$                                    |
| 7.2  | $0.27 \pm 0.01$                      | $47 \pm 2$                       | $(5.8 \pm 0.1) \times 10^3$                                    |
| 7.5  | $0.27 \pm 0.01$                      | $44 \pm 2$                       | $(6.2 \pm 0.1) \times 10^3$                                    |
| 8.0  | $0.24 \pm 0.01$                      | $44 \pm 3$                       | $(5.5 \pm 0.3) \times 10^3$                                    |
| 8.5  | $0.23 \pm 0.01$                      | $37 \pm 2$                       | $(6.2 \pm 0.3) \times 10^3$                                    |
| 9.0  | $0.23 \pm 0.01$                      | $49 \pm 3$                       | $(4.7 \pm 0.2) \times 10^3$                                    |
| 9.5  | $0.18 \pm 0.01$                      | $50 \pm 3$                       | $(3.6 \pm 0.1) \times 10^3$                                    |
| 10.0 | $0.14 \pm 0.01$                      | $74 \pm 7$                       | $(1.9 \pm 0.1) \times 10^3$                                    |

Table S6. pH-rate Profile Data of E208A Mutant Cruzain with Z-RA-AMC.

| pH   | $k_{\text{cat}}$ ( $\text{s}^{-1}$ ) | $K_{\text{m}}$ ( $\mu\text{M}$ ) | $k_{\text{cat}}/K_{\text{m}}$ ( $\text{M}^{-1}\text{s}^{-1}$ ) |
|------|--------------------------------------|----------------------------------|----------------------------------------------------------------|
| 4.2  | $(1.6 \pm 0.1) \times 10^{-3}$       | $149 \pm 13$                     | $11 \pm 1$                                                     |
| 4.5  | $(2.4 \pm 0.1) \times 10^{-3}$       | $152 \pm 18$                     | $16 \pm 2$                                                     |
| 4.8  | $(4.0 \pm 0.1) \times 10^{-3}$       | $123 \pm 4$                      | $33 \pm 1$                                                     |
| 5.1  | $(6.0 \pm 0.1) \times 10^{-3}$       | $162 \pm 7$                      | $37 \pm 2$                                                     |
| 5.4  | $(7.6 \pm 0.1) \times 10^{-3}$       | $155 \pm 4$                      | $49 \pm 2$                                                     |
| 5.7  | $(1.0 \pm 0.1) \times 10^{-2}$       | $166 \pm 3$                      | $60 \pm 6$                                                     |
| 6.0  | $(1.2 \pm 0.2) \times 10^{-2}$       | $162 \pm 5$                      | $74 \pm 13$                                                    |
| 6.3  | $(1.4 \pm 0.1) \times 10^{-2}$       | $160 \pm 8$                      | $88 \pm 8$                                                     |
| 6.6  | $(1.4 \pm 0.1) \times 10^{-2}$       | $159 \pm 17$                     | $88 \pm 11$                                                    |
| 6.9  | $(1.3 \pm 0.1) \times 10^{-2}$       | $136 \pm 7$                      | $96 \pm 9$                                                     |
| 7.2  | $(1.6 \pm 0.1) \times 10^{-2}$       | $166 \pm 9$                      | $96 \pm 8$                                                     |
| 7.5  | $(1.7 \pm 0.1) \times 10^{-2}$       | $163 \pm 3$                      | $104 \pm 6$                                                    |
| 8.0  | $(9.5 \pm 0.1) \times 10^{-3}$       | $113 \pm 9$                      | $84 \pm 7$                                                     |
| 8.5  | $(9.9 \pm 0.1) \times 10^{-3}$       | $132 \pm 5$                      | $75 \pm 3$                                                     |
| 9.0  | $(8.8 \pm 0.1) \times 10^{-3}$       | $145 \pm 8$                      | $61 \pm 3$                                                     |
| 9.5  | $(7.6 \pm 0.1) \times 10^{-3}$       | $146 \pm 20$                     | $52 \pm 7$                                                     |
| 10.0 | $(5.3 \pm 0.5) \times 10^{-3}$       | $195 \pm 25$                     | $27 \pm 4$                                                     |

Table S7. pH Rate Profile Data for E208A Cruzain Mutant-Catalyzed Reactions.

| Substrate | $k_{\text{cat}}$       |               |                |                                | $k_{\text{cat}}/K_{\text{m}}$ |               |               |                                          |
|-----------|------------------------|---------------|----------------|--------------------------------|-------------------------------|---------------|---------------|------------------------------------------|
|           | $\text{p}K_{\text{a}}$ | $\text{p}K_1$ | $\text{p}K_2$  | $c \text{ (s}^{-1}\text{)}$    | $\text{p}K_{\text{a}}$        | $\text{p}K_1$ | $\text{p}K_2$ | $c \text{ (M}^{-1}\text{s}^{-1}\text{)}$ |
| Z-FR-AMC  | n.d.                   | n.d.          | n.d.           | $21.8 \pm 0.4$                 | $4.4 \pm 0.4$                 | $5.0 \pm 0.2$ | $9.9 \pm 0.1$ | $(1.5 \pm 0.1) \times 10^7$              |
| Z-RR-AMC  | $4.4 \pm 0.4$          | $4.9 \pm 0.2$ | $10.0 \pm 0.1$ | $0.25 \pm 0.01$                | $4.4 \pm 0.8$                 | $5.5 \pm 0.2$ | $9.7 \pm 0.1$ | $(5.7 \pm 0.2) \times 10^3$              |
| Z-RA-AMC  | $4.3 \pm 0.6$          | $5.4 \pm 0.1$ | $10.1 \pm 0.1$ | $(1.5 \pm 0.1) \times 10^{-2}$ | $4.6 \pm 0.8$                 | $5.4 \pm 0.3$ | $9.5 \pm 0.1$ | $(8.9 \pm 0.3) \times 10^1$              |

Figure S1. pH-rate Profile of E208A Cruzain-catalyzed Reaction of Z-FR-AMC. The dashed line represents data fitted according to eq. 4. The solid line represents data fitted to eq. 5.

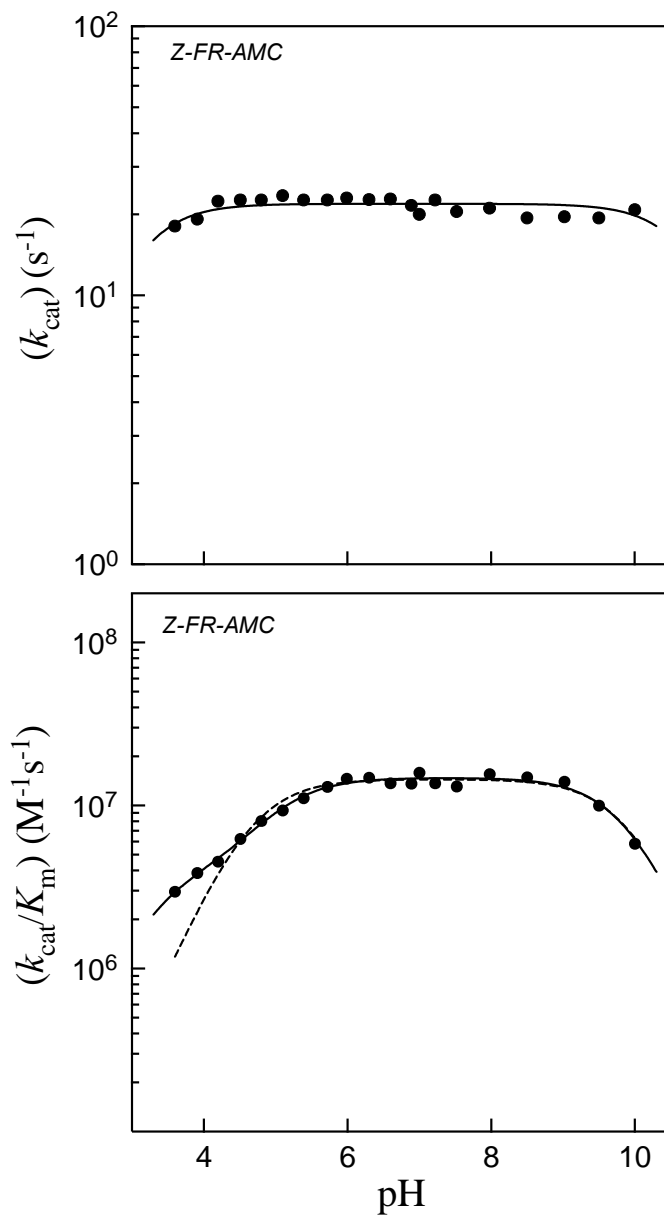

Figure S2. pH-rate Profile of E208A Cruzain-catalyzed Reaction of Z-RR-AMC. The dashed line represents data fitted according to eq. 4. The solid line represents data fitted to eq. 5.

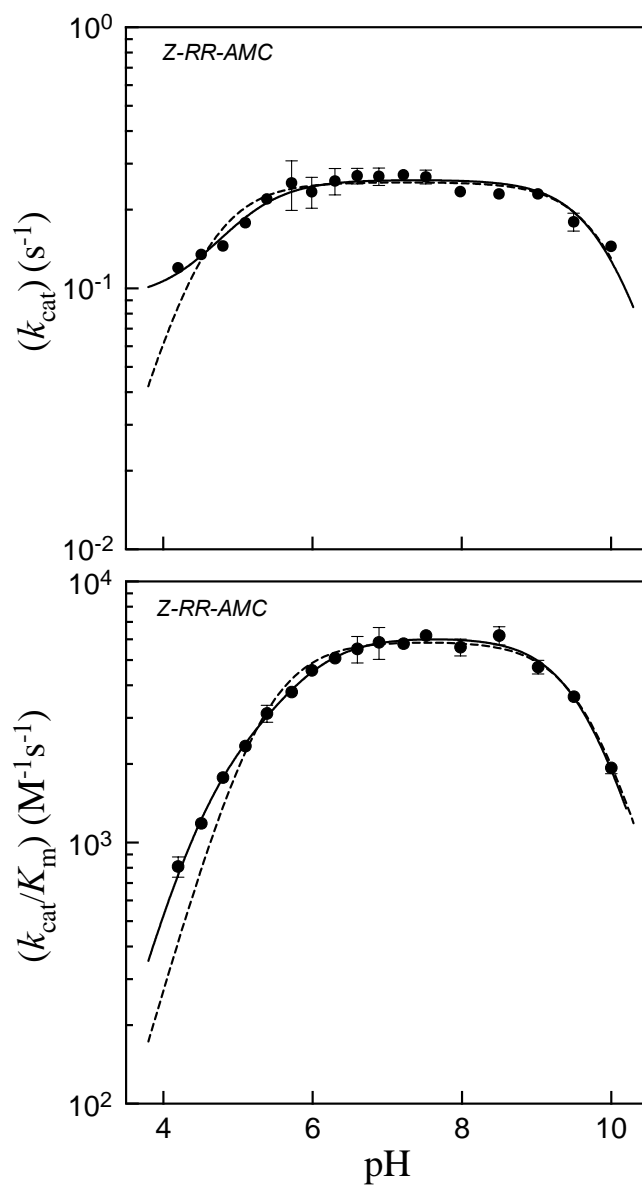

Figure S3. pH-rate Profile of E208A Cruzain-catalyzed Reaction of Z-RA-AMC. The dashed line represents data fitted according to eq. 4. The solid line represents data fitted to eq. 5.

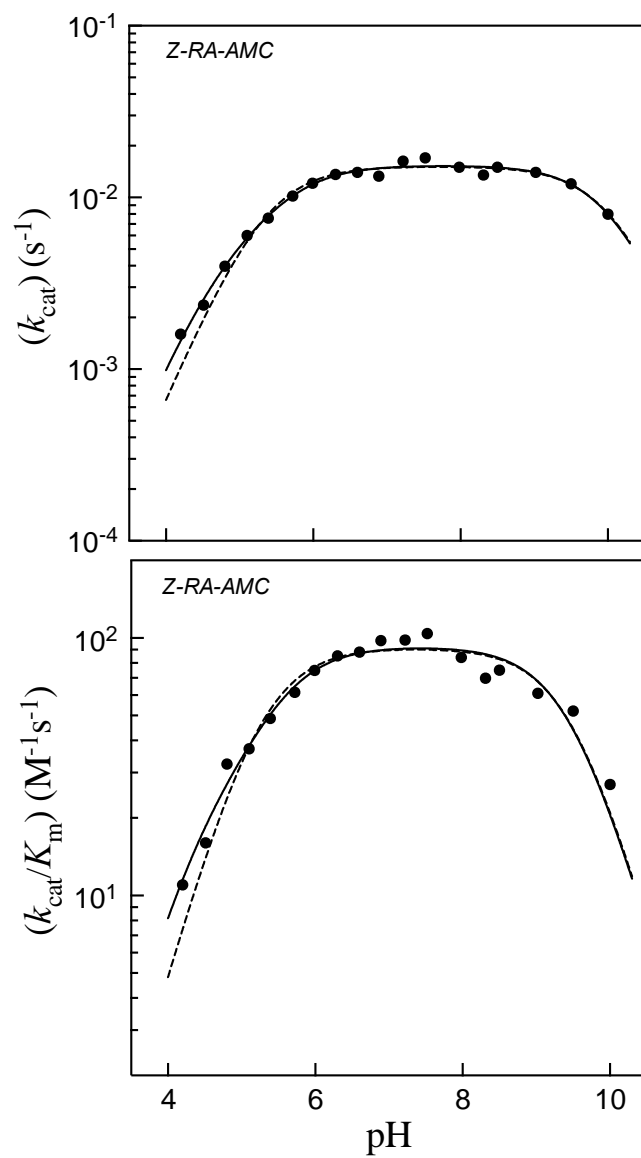



Figure S4. Pre-steady-state Data for Wildtype Cruzain-catalyzed Reaction of Z-RR-AMC in H<sub>2</sub>O and D<sub>2</sub>O.

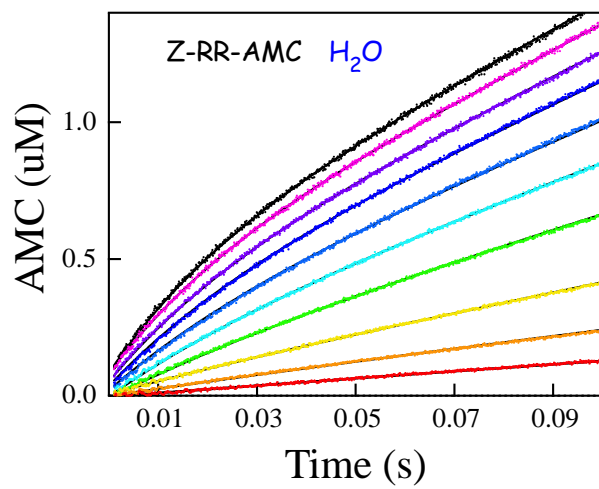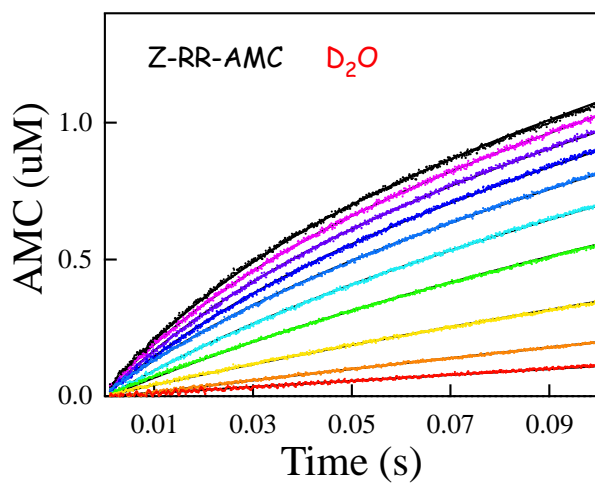

Figure S5. Replots of the Pre-steady-state Kinetic Parameters for Wildtype Cruzain-catalyzed Reactions of Z-RR-AMC in H<sub>2</sub>O and D<sub>2</sub>O. Data were fitted to eq. 1, 9 and 10 for  $v_{ss}$ ,  $\beta$  and  $\lambda$ , respectively.

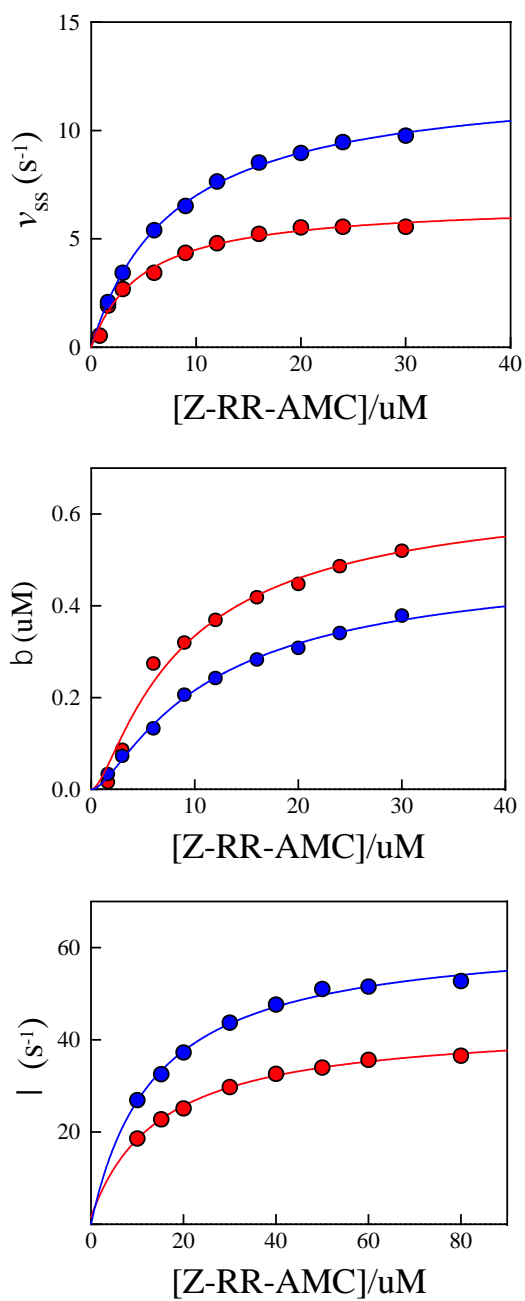

Supplement: NIHMS1914990-supplement-zhai_and_meek_SI.pdf [file NIHMS1914990-supplement-zhai_and_meek_SI.pdf]
